# Supplementary material for: MicroRNA Delivery by Graphene-Based Complexes into Glioblastoma Cells
Source: MDPI journal article supplement (doi:10.3390/molecules26195804), 2021-09-25
Supplement: s1 [file s1]

## Supplementary materials

MicroRNA delivery by graphene-based complexes into glioblastoma cells

Kutwin M.<sup>1\*</sup>, Sosnowska E. M.<sup>1</sup>, Strojny-Cieślak B.<sup>1</sup>, Jaworski S.<sup>1</sup>, Trzaskowski M.<sup>2</sup>, Wierzbicki M.<sup>1</sup>, Chwalibog A.<sup>3</sup>, Sawosz E.<sup>1</sup>

<sup>1</sup> Department of Nanobiotechnology, Institute of Biology, Warsaw University of Life Sciences, 02-786 Warsaw, Poland; marta\_kutwin@sggw.edu.pl (M.K.); malwina\_sosnowska@sggw.edu.pl (M.E.S.); barbara\_strojny@sggw.edu.pl (B.S), slawomir\_jaworski@sggw.pl (S.J.); mateusz\_wierzbicki@sggw.edu.pl (M.W.); ewa\_sawosz@sggw.edu.pl (E.S.);

<sup>2</sup> Centre for Advanced Materials and Technologies CEZAMAT, Warsaw University of Technology, 02-822 Warsaw, Poland; m.trzaskowski@cezamat.pl

<sup>3</sup> Department of Veterinary and Animal Sciences, Faculty of Health and Medical Sciences, University of Copenhagen, 1870 Frederiksberg, Denmark; ach@sund.ku.dk

\* Correspondence: marta\_kutwin@sggw.edu.pl; Tel.: +48-225936671

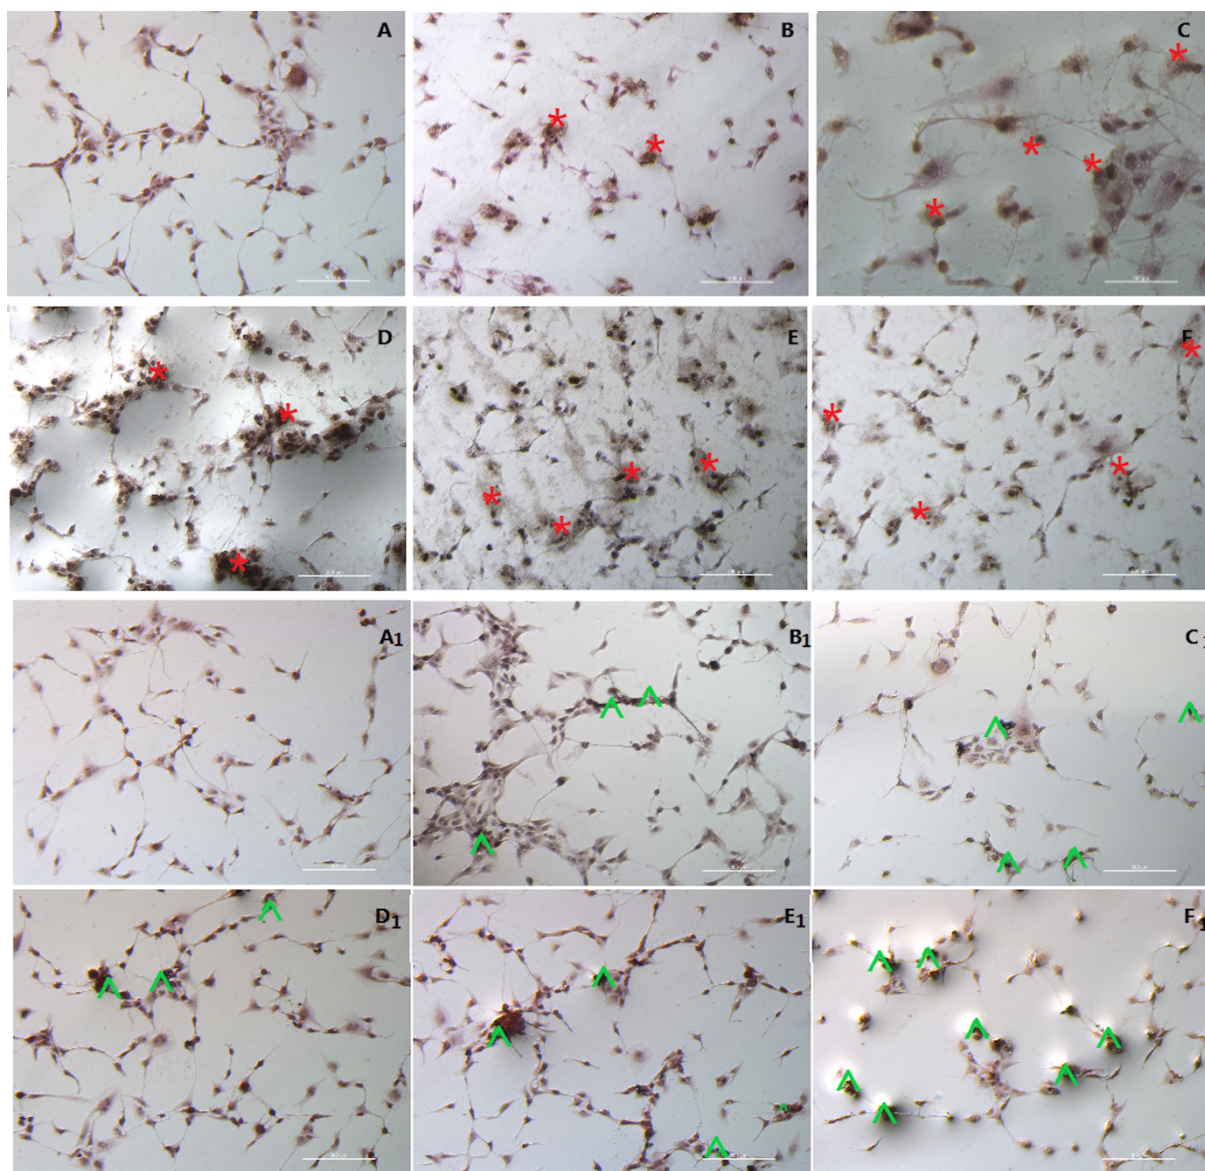

**Figure S1.** Morphology of U87 glioblastoma cells. (A, A1) untreated cells (control group), cells treated with graphene oxide at concentration: 5  $\mu\text{g/ml}$  (B), 10  $\mu\text{g/ml}$  (C), 25  $\mu\text{g/ml}$  (D), 50  $\mu\text{g/ml}$  (E) and 100  $\mu\text{g/ml}$  (F) and reduced graphene oxide at concentration: 5  $\mu\text{g/ml}$  (B1), 10  $\mu\text{g/ml}$  (C1), 25  $\mu\text{g/ml}$  (D1), 50  $\mu\text{g/ml}$  (E1) and 100  $\mu\text{g/ml}$  (F1). Red \*: GO at cell membrane. Green \*: rGO at cell membrane. Light optical microscopy. Scale bars: 100  $\mu\text{m}$ . (A–F). Abbreviations: GO: graphene oxide, rGO: reduced graphene oxide.



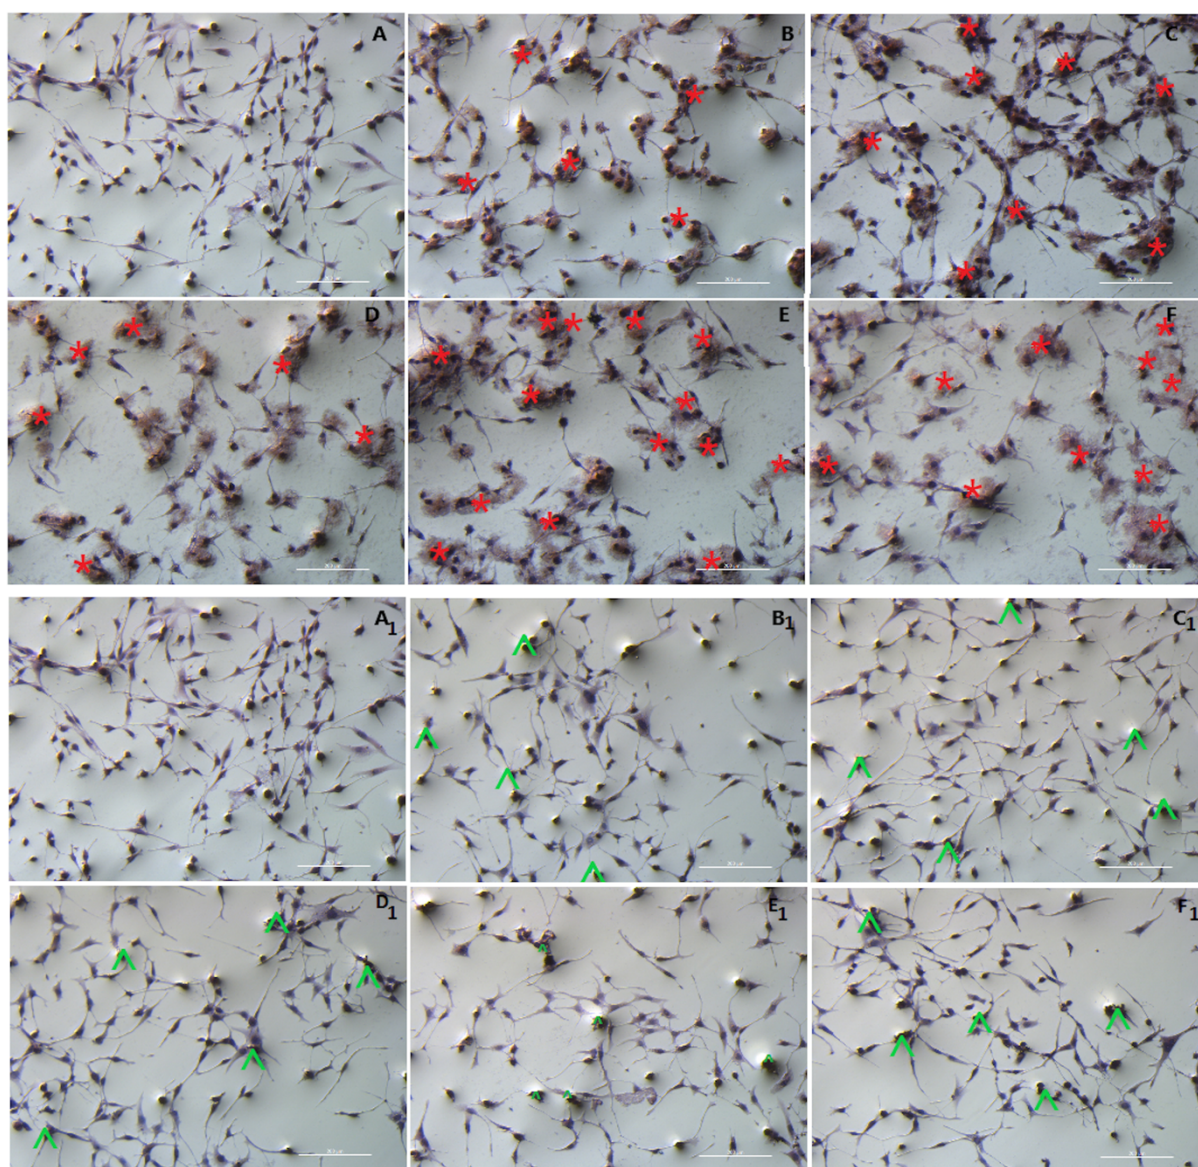

**Figure S2.** Morphology of U118 glioblastoma cells. (A, A1) untreated cells (control group), cells treated with graphene oxide at concentration: 5  $\mu\text{g/ml}$  (B), 10  $\mu\text{g/ml}$  (C), 25  $\mu\text{g/ml}$  (D), 50  $\mu\text{g/ml}$  (E) and 100  $\mu\text{g/ml}$  (F) and reduced graphene oxide at concentration: 5  $\mu\text{g/ml}$  (B1), 10  $\mu\text{g/ml}$  (C1), 25  $\mu\text{g/ml}$  (D1), 50  $\mu\text{g/ml}$  (E1) and 100  $\mu\text{g/ml}$  (F1). Red \*: GO at cell membrane. Green \*: rGO at cell membrane. Light optical microscopy. Scale bars: 100  $\mu\text{m}$ . (A–F). Abbreviations: GO: graphene oxide, rGO: reduced graphene oxide.



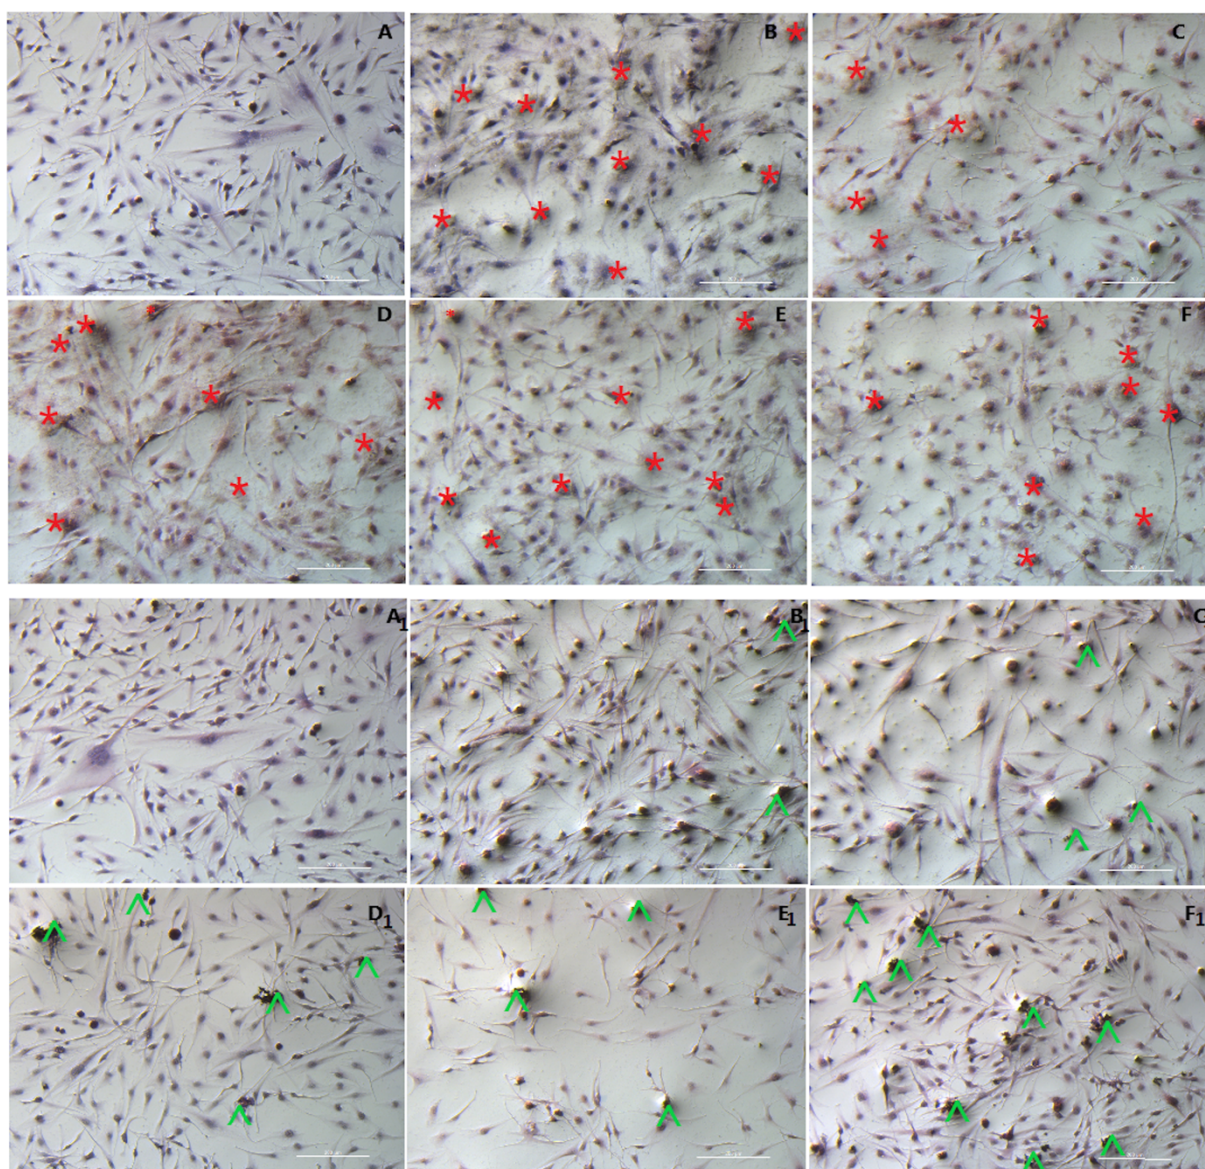

**Figure S3.** Morphology of U251 glioblastoma cells. (A, A1) untreated cells (control group), cells treated with graphene oxide at concentration: 5  $\mu\text{g/ml}$  (B), 10  $\mu\text{g/ml}$  (C), 25  $\mu\text{g/ml}$  (D), 50  $\mu\text{g/ml}$  (E) and 100  $\mu\text{g/ml}$  (F) and reduced graphene oxide at concentration: 5  $\mu\text{g/ml}$  (B1), 10  $\mu\text{g/ml}$  (C1), 25  $\mu\text{g/ml}$  (D1), 50  $\mu\text{g/ml}$  (E1) and 100  $\mu\text{g/ml}$  (F1). Red \*: GO at cell membrane. Green \*: rGO at cell membrane. Light optical microscopy. Scale bars: 100  $\mu\text{m}$ . (A–F). Abbreviations: GO: graphene oxide, rGO: reduced graphene oxide.



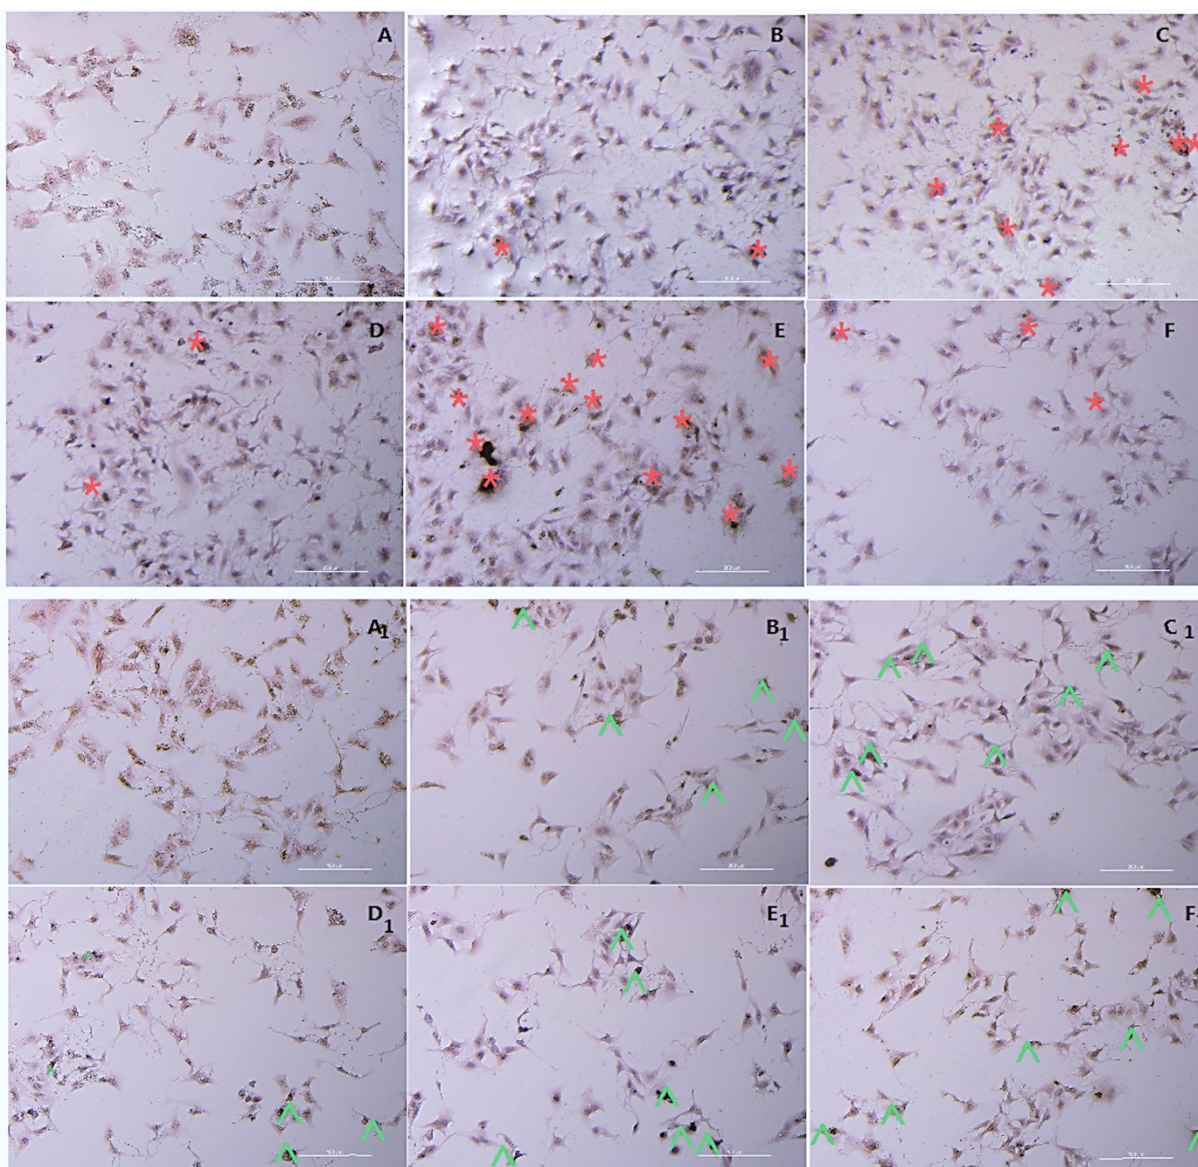

**Figure S4.** Morphology of T98 glioblastoma cells. (A, A1) untreated cells (control group), cells treated with graphene oxide at concentration: 5  $\mu\text{g/ml}$  (B), 10  $\mu\text{g/ml}$  (C), 25  $\mu\text{g/ml}$  (D), 50  $\mu\text{g/ml}$  (E) and 100  $\mu\text{g/ml}$  (F) and reduced graphene oxide at concentration: 5  $\mu\text{g/ml}$  (B1), 10  $\mu\text{g/ml}$  (C1), 25  $\mu\text{g/ml}$  (D1), 50  $\mu\text{g/ml}$  (E1) and 100  $\mu\text{g/ml}$  (F1). Red \*: GO at cell membrane. Green \*: rGO at cell membrane. Light optical microscopy. Scale bars: 100  $\mu\text{m}$ . (A–F). Abbreviations: GO: graphene oxide, rGO: reduced graphene oxide.



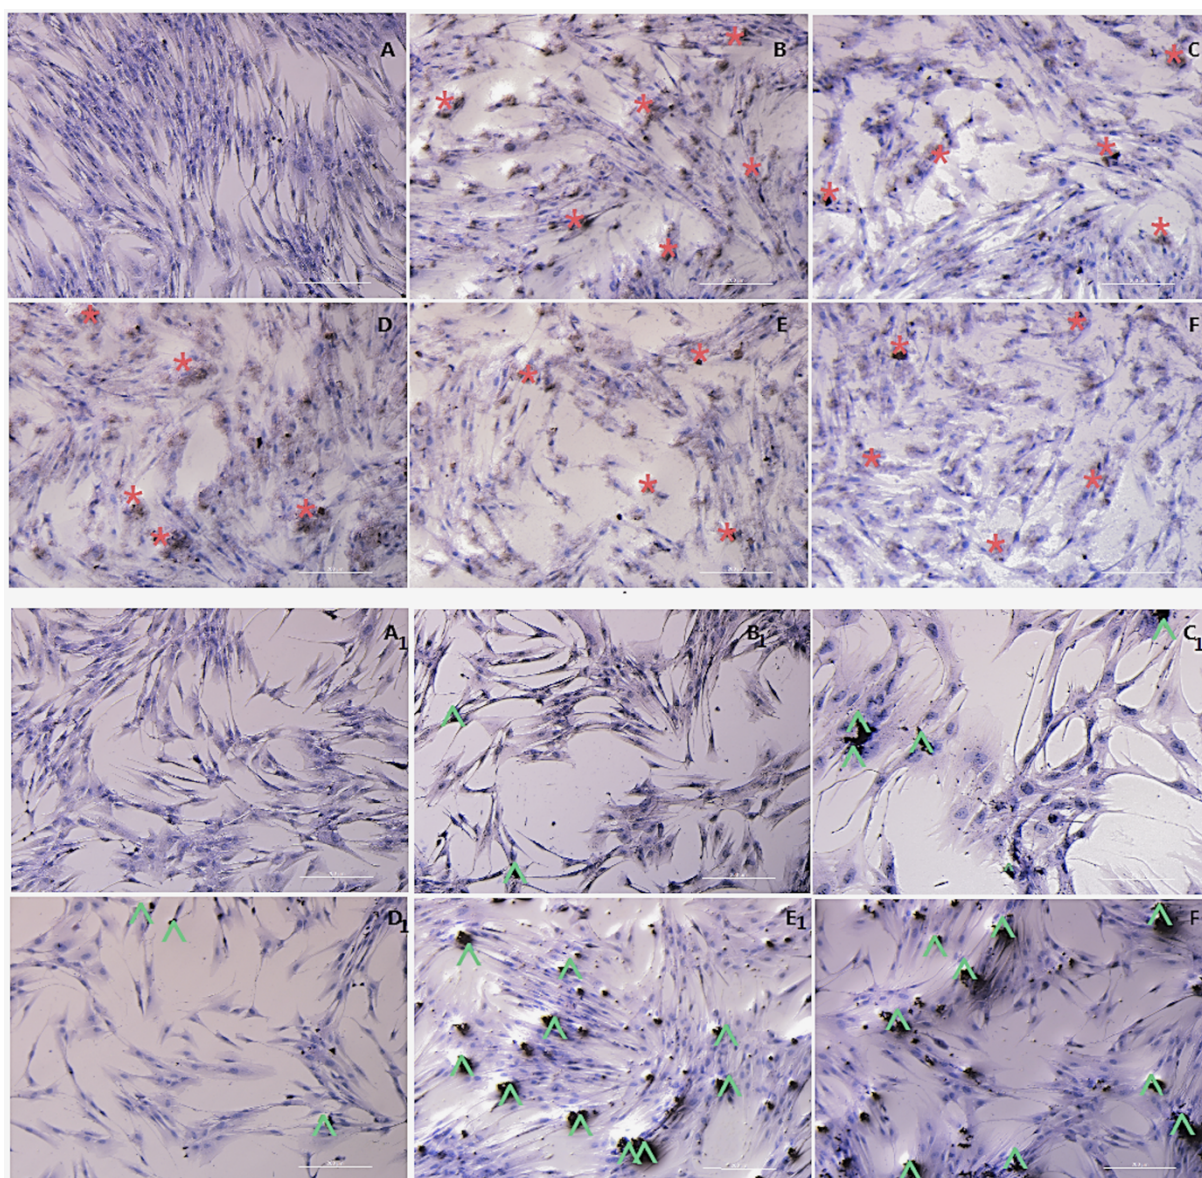

**Figure S5.** Morphology of HFFF-2 human fibroblast cell line . (A, A1) untreated cells (control group), cells treated with graphene oxide at concentration: 5 µg/ml (B), 10 µg/ml (C), 25 µg/ml (D), 50 µg/ml (E) and 100 µg/ml (F) and reduced graphene oxide at concentration: 5 µg/ml (B1), 10 µg/ml (C1), 25 µg/ml (D1), 50 µg/ml (E1) and 100 µg/ml (F1). Red \*: GO at cell membrane. Green \*: rGO at cell membrane. Light optical microscopy. Scale bars: 100 µm. (A–F). Abbreviations: GO: graphene oxide, rGO: reduced graphene oxide.
